# Supplementary material
Source: PubMed Central journal article supplement (PMC4845900)
Supplement: NIHMS779742-supplement-Supplemental_Files.pdf [file NIHMS779742-supplement-Supplemental_Files.pdf]

Supplemental Figure 1: Over-expressed masses at threshold 0.65 for the CNS ROI in LEECHE12A .

Supplemental Figure 2: Effects of normalization on data. a) Average peak intensity for spots before and after normalization. There is a spatial bias for the posterior region in the original data. Spatial bias is removed by normalization. b) Distribution of spot average peak intensities. The average intensity for each laser spots differ greatly. Lack of homogeneity in crystallization can cause this spatial bias. c) Resulting changes in spatial distributions. In both unnormalized images, we see the same bias as in a). At  $m/z = 8563.04$ , the intensities are more evenly distributed throughout the nervous system are distributed after normalization. At  $m/z = 10357.1$ , normalizing the data allowed us to see a signal in the head of the leech.

Supplemental Figure 3: Mask (top) and query (bottom) for the CNS in the LEECHE12A . We can see in the query that a MALDI spot covers about a 10x10 pixels square on the histological image; thus, the query is a set of gray squares instead of the binary black and transparent pixels of the mask.

Supplemental Figure 4: MALDI images for CNS localization at different scores. a) At score  $s = 0.62$ , just below our cut-off of 0.65, we still see localization to CNS, but noise significantly impairs the signal compared to the top-ranked images. b) At score  $s = 0.51$  we expect no localization. Indeed, the intensities outside the nervous system almost perfectly balance out the intensities within the CNS. c) At score  $s = 0.23$ , we are at the other end of the spectrum. We detect a molecule which have inverted expression to the CNS; the molecule is highly expressed in the ventral region of the leech but shows distinct under-expression in the ganglia and the brain.

Supplemental Figure 5: Over-expressed masses in the leech CNS across different samples. We displayed all  $m/z$  values in LEECHE12B with score  $s \geq 0.65$ , and all  $m/z$  values with score  $s \geq 0.70$  in LEECHE12A . We only showed  $m/z$  values with score  $s \geq 0.65$  in LEECHE12A if it corresponded to a hit in LEECHE12B as the full table is quite extensive (Supplemental Table 1). Results for  $m/z < 2200$  were discarded because spectra were still in the noise area.

Supplemental Figure 6: Simulation results decreasing ROI signal over the entire region. Intensities are decreased in the ROI spots by a certain percentage until the average intensity inside the ROI is the same as the average intensity outside the ROI. Score and signal decrease in a similar fashion. Similar intensities in the ROI and in the background lead to a score close to 0.5 as expected.

Supplemental Figure 7: Simulation results when degrading the signal in the ROI. We set a proportion of the ROI spots to have random non-ROI (or background) intensities (see Methods). It is then possible to balance the total ROI intensities by distributing the subtracted intensity to the remaining spots; that way, the total intensities in ROI and outside ROI remain the same throughout the simulation. Results are shown for two simulated runs: with and without balancing the ROI intensities. In both cases, the score linearly decreases as more ROI spots are set to background intensity. In the balancing case, the intensities of the remaining spots increase to compensate for the other spots; consequently, the score remains higher in the balanced case than in the unbalanced case, as expected. When all spots are set to background intensities, the signal is lost and the probability score decreases to 0.5 as expected.

Supplemental Figure 8: ClustalW alignment of the HmIF4 protein sequence with those of three other known intermediate filaments in *Hirudo medicinalis*. The EST open reading frame aligned particularly well in the conserved rod domain, and has more variability outside of that domain. The peptide we identified is located in a variable region in the 5' end of the rod domain where the sequences are quite dissimilar, thus confirming the discovery of a novel protein.

Supplemental Figure 9: Annotated spectrum for a peptide from the histone H2B. Parent mass  $\simeq 2500$  Da was shown to have a CNS specific expression. *In situ* hybridization of the mRNA shows a preferential location in the CNS, but with a relatively weaker signal.

Supplemental Figure 10: Annotated spectrum for uncharacterized peptide. Parent mass  $\simeq 3841$  Da was shown to have a dorsal specific expression similar to another fragment 2 amino acids shorter showing in Figure 5.

Supplemental Figure 11: Distribution of the MS1 raw data peaks for 2 experiments. Intensity of top peaks (162.2 and 1526.5) for annotated spectra are indicated by red line.

Supplemental Figure 12: Identification of several other peptides. Peptides were identified using Inspect with an FDR cut-off of 0.01. Biological annotations were achieved by doing a Blast search of the protein sequence against NCBI nr and keeping the top hit if the E-value was less than or equal to  $1e-5$ .

| <i>m/z</i> -range | peak    | score |
|-------------------|---------|-------|
| 2470.68-2481.44   | 2474.34 | 0.80  |
| 2505.32-2508.31   | 2506.7  | 0.69  |
| 2521.69-2527.93   | 2524.69 | 0.78  |
| 3090.6-3096.75    | 3093.93 | 0.71  |
| 3157.97-3165.99   | 3160.3  | 0.71  |
| 3295.94-3303.86   | 3299.64 | 0.76  |
| 3485.31-3496.45   | 3491.01 | 0.80  |
| 3496.45-3531.63   | 3511.43 | 0.90  |
| 3536.01-3542.31   | 3540.11 | 0.71  |
| 3651.01-3651.57   | 3651.29 | 0.65  |
| 3652.4-3652.4     | 3652.4  | 0.65  |
| 4211.19-4214.18   | 4211.79 | 0.67  |
| 4371.25-4383.43   | 4378.86 | 0.69  |
| 4523.78-4529.97   | 4526.88 | 0.69  |
| 4539.58-4547.64   | 4542.06 | 0.70  |
| 5268.46-5278.82   | 5273.47 | 0.76  |
| 5279.83-5280.16   | 5279.83 | 0.66  |
| 5410.4-5429.38    | 5417.85 | 0.81  |
| 5430.06-5432.43   | 5431.41 | 0.68  |
| 5434.81-5436.5    | 5435.48 | 0.68  |
| 5560.06-5606.15   | 5574.15 | 0.90  |
| 6024.92-6024.92   | 6024.92 | 0.65  |
| 6025.63-6026.7    | 6026.7  | 0.66  |
| 6186.44-6186.8    | 6186.44 | 0.65  |
| 6187.53-6200.57   | 6196.95 | 0.68  |
| 6212.91-6212.91   | 6212.91 | 0.65  |
| 6216.54-6220.89   | 6217.99 | 0.66  |
| 6223.8-6223.8     | 6223.8  | 0.65  |
| 6593.09-6593.46   | 6593.09 | 0.65  |
| 6594.58-6595.33   | 6595.33 | 0.66  |
| 8205.81-8205.81   | 8205.81 | 0.65  |
| 8207.89-8216.66   | 8213.32 | 0.66  |
| 8217.49-8218.33   | 8218.33 | 0.65  |
| 8220-8220         | 8220    | 0.65  |
| 8223.76-8223.76   | 8223.76 | 0.65  |
| 8399.29-8400.14   | 8399.72 | 0.66  |
| 8400.98-8447.91   | 8428.45 | 0.88  |
| 8448.76-8449.61   | 8449.18 | 0.66  |
| 9032.26-9041.02   | 9038.39 | 0.74  |
| 9224.17-9249.86   | 9240.11 | 0.70  |
| 9250.74-9257.83   | 9253.4  | 0.67  |
| 9779.68-9779.68   | 9779.68 | 0.65  |
| 9780.59-9781.05   | 9780.59 | 0.65  |
| 10868.4-10869.8   | 10869.4 | 0.67  |

Supplemental Figure 1

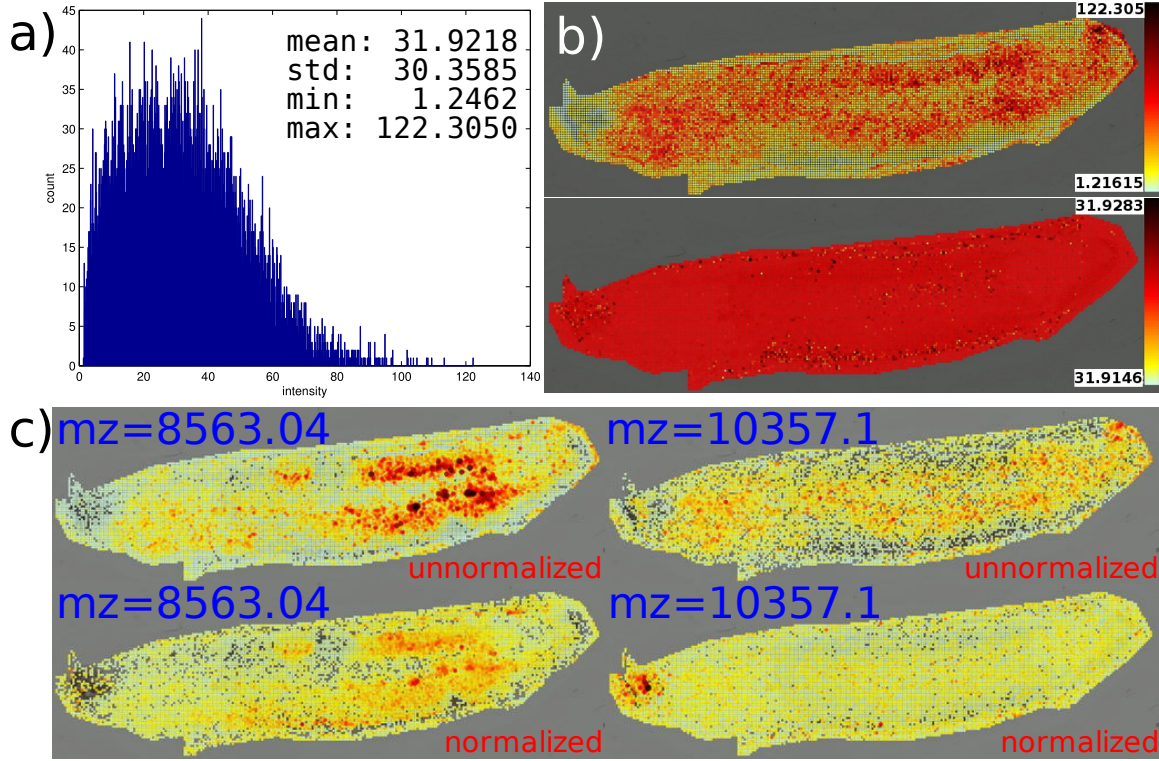

Supplemental Figure 2



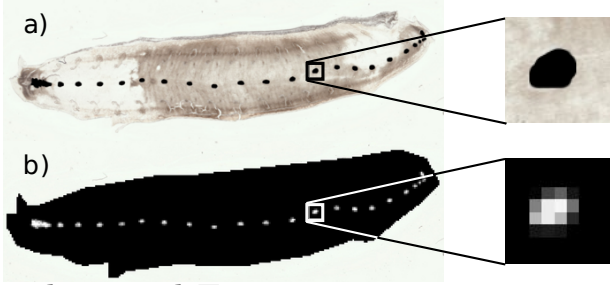

Supplemental Figure 3

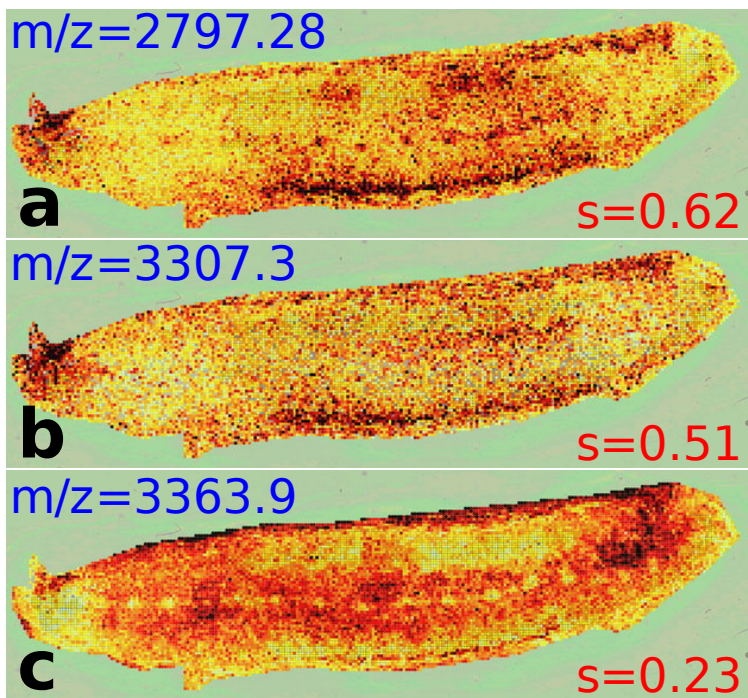

Supplemental Figure 4

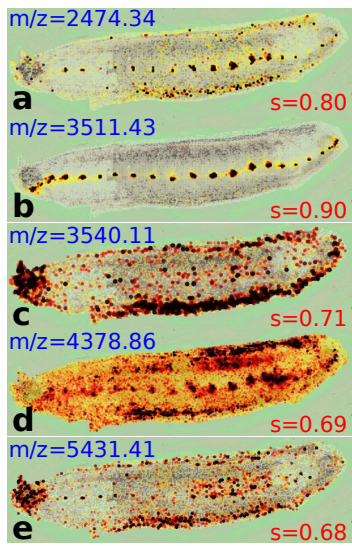

| LEECH E12A      |       | LEECH E12B      |       |
|-----------------|-------|-----------------|-------|
| <i>m/z</i> peak | score | <i>m/z</i> peak | score |
| 2474.34         | 0.797 | 2474.34         | 0.653 |
| 2479.6          | 0.727 |                 |       |
| 2524.69         | 0.78  |                 |       |
| 3093.93         | 0.705 |                 |       |
| 3160.3          | 0.708 |                 |       |
| 3299.64         | 0.76  |                 |       |
| 3491.01         | 0.797 |                 |       |
| 3511.43         | 0.896 | 3507.89         | 0.882 |
| 3523.98         | 0.713 |                 |       |
| 3540.11         | 0.71  | 3539.84         | 0.654 |
| 4378.86         | 0.691 | 4377.95         | 0.697 |
| 4542.06         | 0.702 |                 |       |
| 5273.47         | 0.758 |                 |       |
| 5417.85         | 0.814 |                 |       |
| 5426.66         | 0.708 |                 |       |
| 5431.41         | 0.675 | 5433.79         | 0.681 |
| 5574.15         | 0.899 |                 |       |
| 5586.87         | 0.805 |                 |       |
| 5601.33         | 0.717 |                 |       |
| 8428.45         | 0.899 |                 |       |
| 9038.39         | 0.736 |                 |       |
| 9240.11         | 0.701 |                 |       |

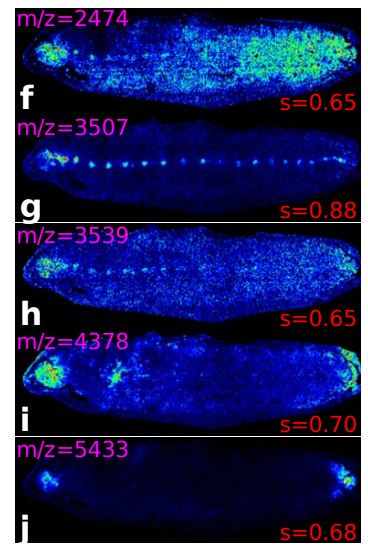

Supplemental Figure 5

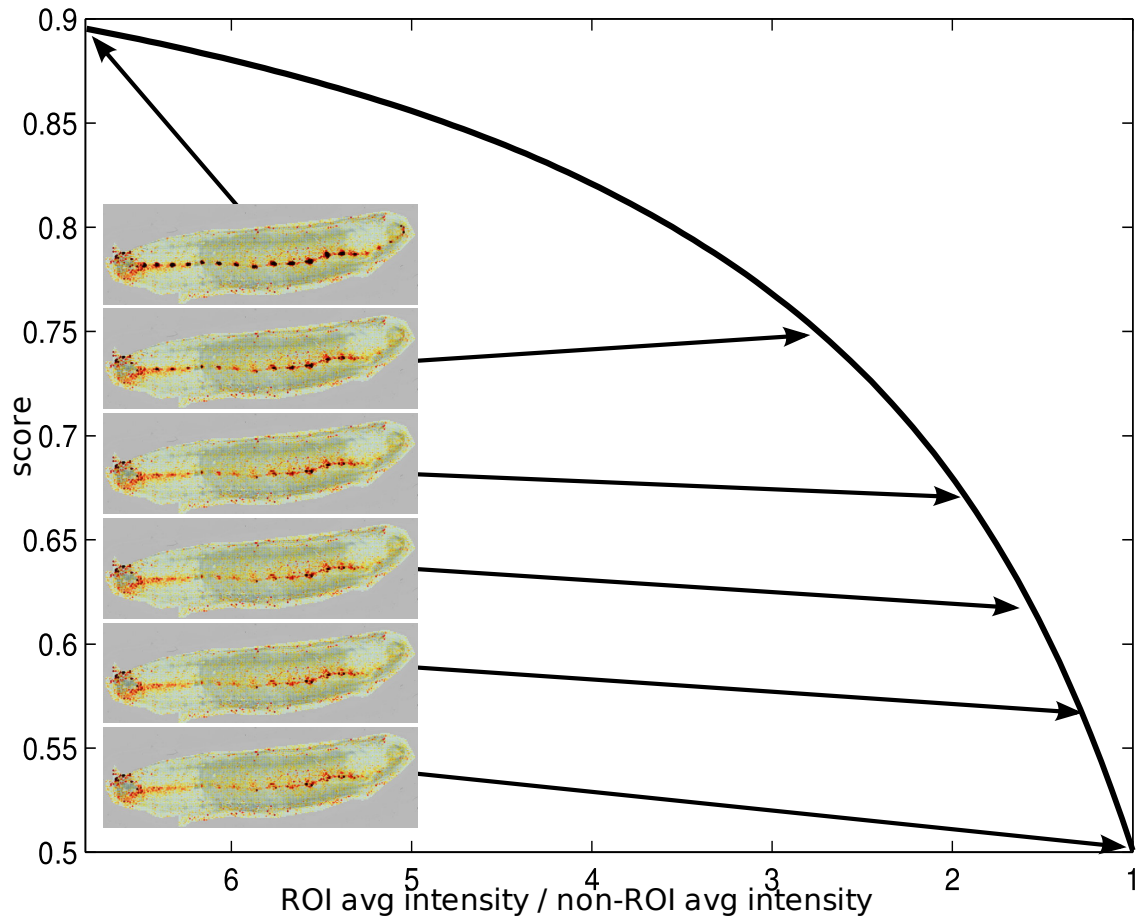

Supplemental Figure 6

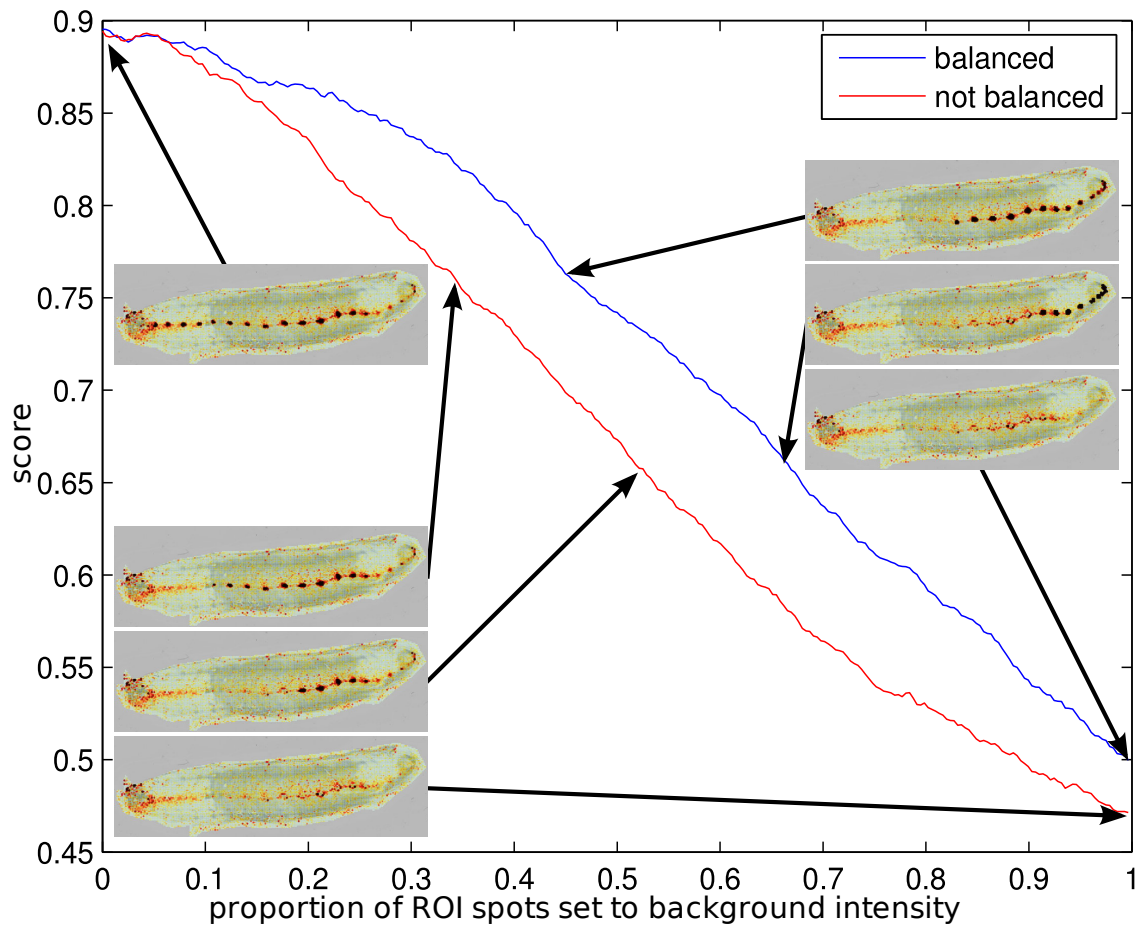

Supplemental Figure 7

CLUSTAL 2.0.12 multiple sequence alignment

```

leech_EST      --TFTEMERTRVRNTYTTSSGVDGNGVGGASTFRES--SYGAGGPITG 46
gliarin        ---MAEEVITKTRRVRYKTEISGGEGSSILATTYR-----PSVT 37
filarin        ----MESGNFVAEYERTIRSH-----VVTRSVGVWVYGGG-----IQ 19
macrolin       ARQIEPLGMDTRIKSSYVNSQSGDKVSTKSMVDLDTGSTYSTYKATVV 50
               . . . . .
leech_EST      GRTLVISRTIGSTGSPMGMSIGLGGTRTMERSVRTSSQYASGGPMPNYSV 96
gliarin        PRNVIHRSIQIAPLGSMSSS----TIRREKTIQVGNAYAIISP--SSYAP 81
filarin        PRNLIQRATPAGTMSRSR-----VVTRSVGVWVYGGG-----54
macrolin       PHQLIQRITLTLGSLSSGGGSL-----RSTADRFRRSMVPGVH-----88
               : : * : . . . . .
               ▶rod domain
leech_EST      ITATGVSGIKESRDEKQMDLNERFANYIDKVRNLEAQNKLAEEDLSR 146
gliarin        LASSGVSVKNSREREKQMDLNERFASYIEKVRFLAQNKRITDELDK 131
filarin        VAGGAATSVTDQRNKRREKQMDLNERFAGYIEKVRFLAQNKLAELEDA 104
macrolin       LATKEVDSARFTRREKQMDLNERLRLRYIETVRFLAQNKLDEIKT 138
               : : . . . * . . . . .
leech_EST      LKEKWGKDTVOVKAMFQVDLDECRHQLDEAEKEKARLEIRLASLEEEED 196
gliarin        LKSRWKGDTTQIKAMFQVDEARRLDDEGEKARLEIKIASLEEINEE 181
filarin        LKSRWKGDTTQIKAMFQVDEARRLDDEGEKARLEIKIASLEEINEE 154
macrolin       LKAKWGTESQVRAMPFADLEEARRIKDDLEKDTAKLEIRISSVIEALDV 188
               ** : * : * : : : : : : : : : * : * : * : * : * : * : * :
leech_EST      LRQELALAAQOLSENAQFIKNNQLLDYSEIQLRKRIEQLNEKERD 246
gliarin        LAVKLNELQNTNEERQKIDRQNLQSDYEGEISLRRRVEGLEADKDK 231
filarin        LRRKLEANAAVDESRLKLEQIQIAEIQSEVHLLRSLDLDGDKRYN 204
macrolin       EKRRNATSEKIIIEYREKIENQRQLVDLQANNDLQRRLELLEGDRDRD 238
               . : * : . : . : . : . : * : * : * : * :
leech_EST      KKNIAQLKELLAKARQDLNETLEHTHAENRCOTLOEEDFLKSIHQEM 296
gliarin        RKTIAATLNAALNARANLDEETLRHDAENRCOTLOEEDFLKSIHQEM 281
filarin        KATLSKLEQLNARATFDQAQVEHDAEAERLALAEELAFKELHQEQ 254
macrolin       KKLVLGELKEAVTRYRTDLDSDQLLYVDADRNRQSLAEELDFLQVHQEM 288
               : : * : : * : : : : * : : * : * : * : * : * : * :
leech_EST      KELAALAYRDTAPE-RDYWKNEAQAALREIQEMYDDKFDSTRTEIHTHY 345
gliarin        KELAALAYRDTTTEENDFWKNEMGAALREIQEMYDEKDLRTEIESSY 331
filarin        RELAAKAYFDSTASNREYWKSEMSMELKQLQEHYGEKIDELQNEMLNYS 304
macrolin       KELNLIKLDYSIVNRQYKTEMERALKEIQDYDELDSDMRDETETFYQ 338
               : * : * : * : * : * : * : * : * : * : * : * : * :

leech_EST      TKVQEYKTVARAVTETQRKEDTTKLRQDLDRDKLNELTSQNTSLTR 395
gliarin        LKLOEFRGTATKQNELESTHTKEETKRLKIQVTDLRDKLSDLEGNLQVLR 381
filarin        MQVOSLN--LPRPAIVST-TKEESVRIHQVTHEIRTKVLEFEGRNDMHLR 351
macrolin       LKIQEIRNSSQRSALVDAQDQAKTAKKHSNVELEDRVITILEGQNTLQN 388
               : * : . . . . .
leech_EST      EFELARRKEDQERDLEQYRTQLHAEASTLRFELERILSDLQRIQIMDTKLG 445
gliarin        ELENLRSKEELEREFHENGELKAEIARLRAELESIQLEQINIMDTKLG 431
filarin        EIEEMHRDMEEREIEVMKDIDATKSEIITMKAEMDAITKEALEALLDAKLS 401
macrolin       ELDFKLESEHRELDLEVENDTLRLEACKYKAELESLEWIEIDKIRSAKDG 438
               * : : . . * : : : * : : * : : : : : * :
               ▶rod domain ◀
leech_EST      LELEIAAYRKLLEGEENRKLQISMOSGGGFAYGGGAGAGGGGGAGG--A 493
gliarin        LELEIAAYRKLLEGEESRVLKOLVEMYSG--GGGGVAISGGLSGGLG 478
filarin        LELEIAAYRKLLEGEADGELRQVDMFDF-----SYASATASAAAAYA 445
macrolin       LELEIAAYRKLLEAEEGRFMKEIIEKRL-----DKHDCSOHVKYRYVT 482
               ***** : * : * : . . . . .
leech_EST      GGAGGAGSYGYSS---YGSASGFASGGGNAATSVQMGSAKTTYHKSAL 539
gliarin        GGSSYNESYSYSSNAASASAGLAGGAFSSGLSKEIARSARTTFOKSAK 528
filarin        DGIYEGYNGSAAG--FSSSTLSRKITGSSSLVGG--RTSYQRMAR 488
macrolin       ENYSGD-----SQTINQSVKKTETS-----KTSVQKSK 512
               . : * : : * : : : :
leech_EST      GPISISMCTPDGKLVLENTGTREENIEGKIVRVWDGQDPEFKLDGRF 589
gliarin        GTTSAIETS PDGKYVLENSGRKTESLGGWRNLNRVDDVEVNVFVPSDL 578
filarin        GPVSI ESECPDGKFI VLENTGKRRELGGFTLKRKVQDGVDPVYFKADA 538
macrolin       GPVAIAECSMDGKFI VLENTGKRDEQLGGYKIRRNINGLDKVEFDFRNF 562
               * : * : : * : : * : * : * : * : * : : :
leech_EST      SSLKRQKTIYARGAKPRTAGARDIEANFESHWGIGAQAATKLINPEGEE 639
gliarin        K-LNAGEKFKVWAGQKPINASSNDVEANVDNFGISGNTLRLTYNLTGEE 627
filarin        G-VDPHMKIWKVWAKRPSNATASDIEVDIIMGVGTGNTITGLFNSGDD 587
macrolin       V-LRAGAKTIWANKRPLSAFSSDLEADFPSPGVERITGLFNSGDD 611
               : * : : * : * : * : * : * : * : * : * : * : * :
leech_EST      KATHTKTYVTS-----651
gliarin        RATHVQKTYVY-----638
filarin        RATHIQKTLA-----597
macrolin       RASYMQIVRPTVLEPCRPALLEGPTDHLRHFLLDPOI 649
               : * : * .

```

Supplemental Figure 8

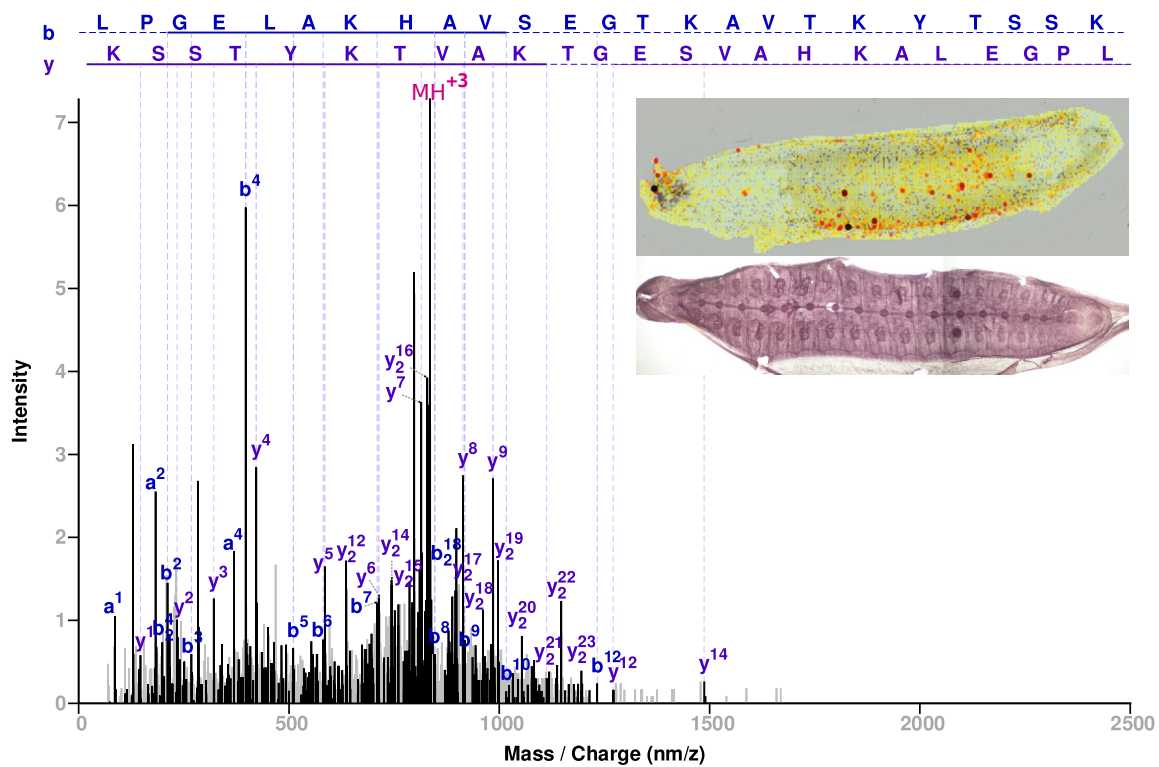

Supplemental Figure 9

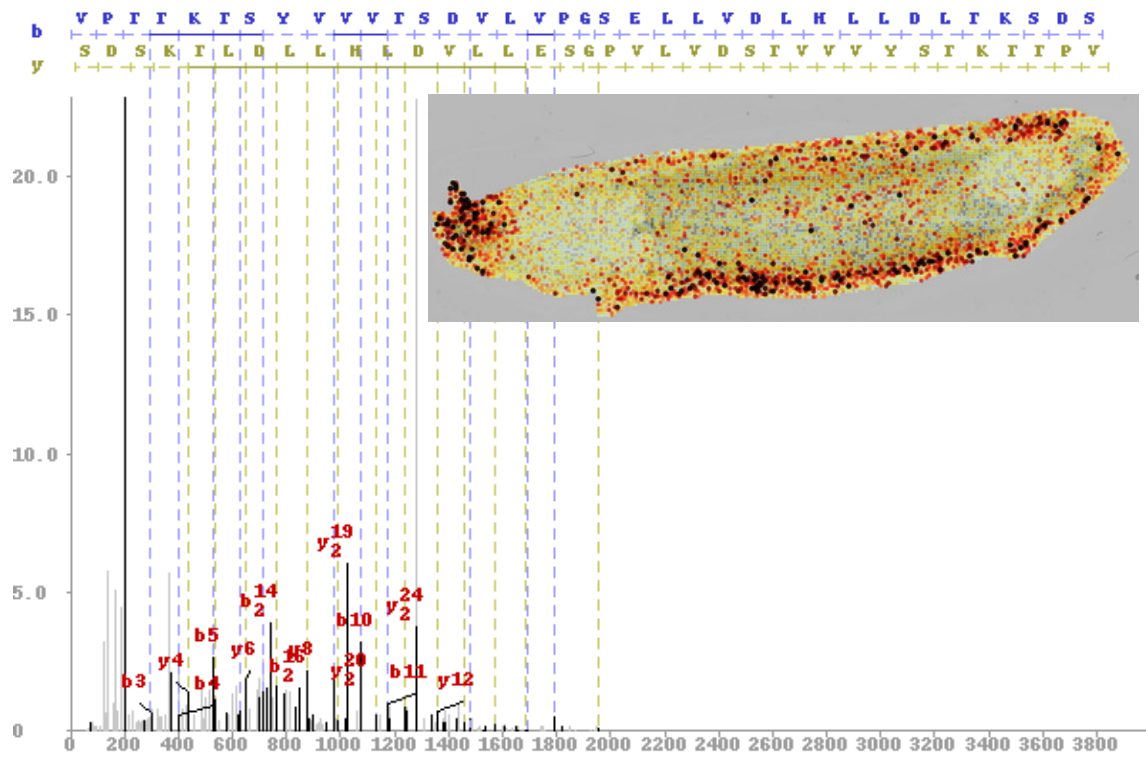

Supplemental Figure 10



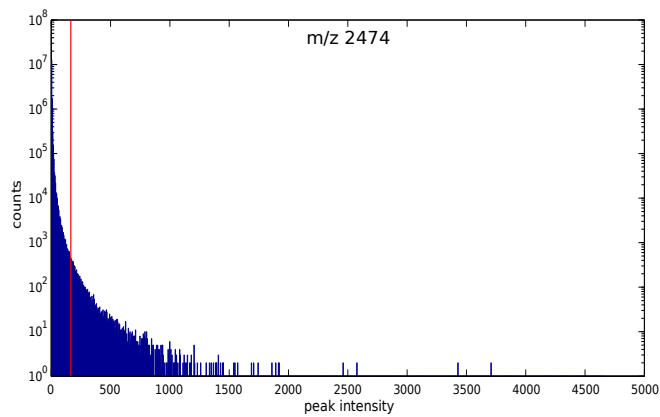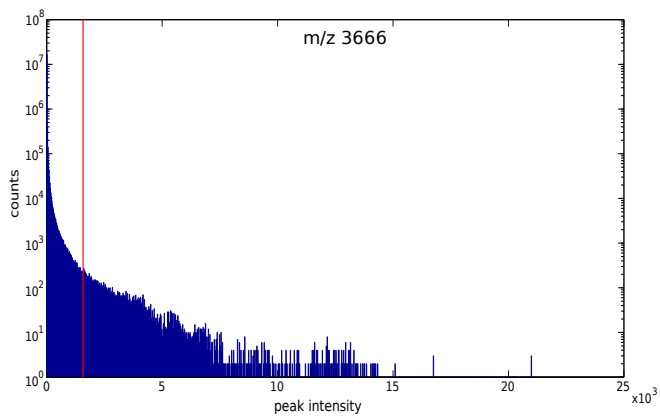

Supplemental Figure 11

Supplemental Figure 12

| parent mass | annotation                   | signal  | blast top hit ( $E \leq 1e-5$ )                                                                                                                                                                         | image                                                                                                                                                                                                                                                             |
|-------------|------------------------------|---------|---------------------------------------------------------------------------------------------------------------------------------------------------------------------------------------------------------|-------------------------------------------------------------------------------------------------------------------------------------------------------------------------------------------------------------------------------------------------------------------|
| 1353.81     | G.ASGGIGQPLSLLLK.L           | CNS     | gi 175040807 sp Q5NVR2.1 MDHM_PONAB<br>RecName: Full=Malate dehydrogenase, mitochondrial                                                                                                                | N/A                                                                                                                                                                                                                                                               |
| 1993.94     | T.SYIEDFDVSTLPEHQLT.G        | CNS     | N/A                                                                                                                                                                                                     | 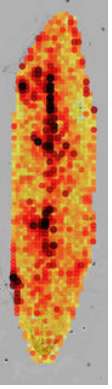                                                                                                                                                                                 |
| 2107.00     | L.SLWANNSEKINFQ-17LDGNSS.R   | ventral | gi 122095553 sp Q9R0M0.2 CELRL2_MOUSE<br>RecName: Full=Cadherin EGF LAG seven-pass G-type receptor 2; AltName: Full=Flamingo homolog;                                                                   |                                                                                                                                                                                  |
| 1829.91     | K.SDQVHGLFSVNVVREK.C         | ventral | gi 117949389 sp Q6YHK3.2 CD109_HUMAN<br>RecName: Full=CD109 antigen; AltName: Full=150 kDa TGF-beta-1-binding protein; AltName: Full=C3 and PZP-like alpha-2-macroglobulin domain-containing protein 7; |                                                                                                                                                                                  |
| 1940.00     | L.FFTQFTPLFFKPGLSY.V         | lateral | N/A                                                                                                                                                                                                     |                                                                                                                                                                                  |
| 1633.84     | L.FFSQFTPAFFKPGL.T           | dorsal  | gi 117949389 sp Q6YHK3.2 CD109_HUMAN<br>RecName: Full=CD109 antigen; AltName: Full=150 kDa TGF-beta-1-binding protein                                                                                   |                                                                                                                                                                                 |
| 2598.29     | R.HVADIRADDFSEKGGVIGLQAGTN.Q | dorsal  | gi 1584954 sp Q08093.1 CNN2_MOUSE<br>RecName: Full=Calponin-2; AltName: Full=Calponin H2, smooth muscle;                                                                                                | <br><br> |

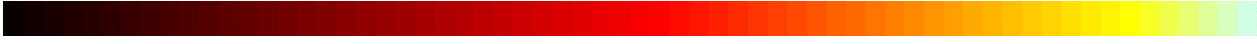

|         |                               |        |                                                                                                                                                           |  |
|---------|-------------------------------|--------|-----------------------------------------------------------------------------------------------------------------------------------------------------------|--|
| 1916.89 | R..NVAEVPNVADENDFPSLS.I       | dorsal | gi 52783213 sp Q9CY58.2 PAIRB_MOUSE<br>RecName: Full=Plasminogen activator inhibitor 1 RNA-binding protein; AltName: Full=PAI1 RNA-binding protein 1;     |  |
| 2456.10 | D.ASNQDTTTTCIYSSRYENYL.N.A    | dorsal | gi 188909565 sp Q64449.2 MRC2_MOUSE<br>RecName: Full=C-type mannose receptor 2; AltName: Full=Lectin lambda; AltName: Full=Macrophage mannose receptor 2; |  |
| 1918.04 | N.ILSVGIGSAPYMSPQLTAL.A       | dorsal | gi 189082905 sp A2AX52.2 C06A4_MOUSE<br>RecName: Full=Collagen alpha-4(VI) chain;                                                                         |  |
| 2977.39 | N.GRKLEEDDEVPLVENFDEASKTEVN.M | dorsal | gi 166774043 sp Q64152.3 BTF3_MOUSE<br>RecName: Full=Transcription factor BTF3; AltName: Full=RNA polymerase B transcription factor 3                     |  |
| 2842.66 | M.TKNHLNASMIKTFCLKIPGLITLYL.L | dorsal | N/A                                                                                                                                                       |  |
| 2467.33 | R.PNLAPVTRDVLVTFVDQSHVLF.F    | dorsal | N/A                                                                                                                                                       |  |
| 1869.07 | S.YVGQVLLKPVDEVLP.LS.S        | dorsal | N/A                                                                                                                                                       |  |
| 2447.36 | K.PNLVVPVTRDVLVTFVDQSHVLF.F   | dorsal | N/A                                                                                                                                                       |  |
| 1270.67 | R.GEEVVLEVHLF.N               | dorsal | gi 259016204 sp Q8IZJ3.2 CPMD8_HUMAN<br>RecName: Full=C3 and PZP-like alpha-2-macroglobulin domain-containing protein 8                                   |  |

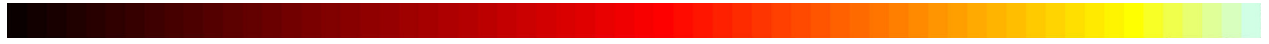

|         |                               |              |                                                                                                                                      |  |
|---------|-------------------------------|--------------|--------------------------------------------------------------------------------------------------------------------------------------|--|
| 1887.98 | *.AKFEDKESGKVVTAHLE.E         | dorsal       | N/A                                                                                                                                  |  |
| 1154.63 | T.KRKYVAFDQ.K                 | dorsal       | N/A                                                                                                                                  |  |
| 1918.01 | L.QLWFTCLTFHGHQ+1PI.N         | dorsal       | N/A                                                                                                                                  |  |
| 2949.65 | N.LRFVRRRSLRQHYLLRKKPDW+16T.C | dorsal       | N/A                                                                                                                                  |  |
| 1735.87 | L.FFSQTPVFFKPGLS              | not specific | gi 81879137 sp Q8R422.1 CD109_MOUSE<br>RecName: Full=CD109 antigen; AltName: Full=GPI-anchored alpha-2 macroglobulin-related protein |  |
| 1661.87 | E.FTPVFFKPGLSYVG.Q            | not specific | gi 259016204 sp Q8IZJ3.2 CPMD8_HUMAN<br>RecName: Full=C3 and PZP-like alpha-2-macroglobulin domain-containing protein 8              |  |
| 1967.99 | L.FFSEFTPQFFKPGLLY.V          | not specific |                                                                                                                                      |  |
| 1957.96 | L.VQNVPEFNEAVPSSRPTS.V        | not specific |                                                                                                                                      |  |
| 1673.78 | R.SFAPMSLKDASKDNY.F           | not specific | N/A                                                                                                                                  |  |

|         |                        |              |                                                                                                                                                           |     |
|---------|------------------------|--------------|-----------------------------------------------------------------------------------------------------------------------------------------------------------|-----|
| 1318.67 | R.GEEFVLEVHFLF.N       | not specific | gi 117949389 sp Q6YHK3.2 CD109_HUMAN<br>RecName: Full=CD109 antigen; AltName: Full=150 kDa TGF-beta-1-binding protein                                     |     |
| 1842.90 | L.VQNVPEFNEAAPSSRPT.S  |              |                                                                                                                                                           |     |
| 1824.17 | E.VVLKPKKFEVVTVPLK.T   |              |                                                                                                                                                           |     |
| 1814.90 | R.CQSFLLKLSHCQAHL.V    | not specific | gi 55583881 sp Q68Y21.1 GRID2_DANRE<br>RecName: Full=Glutamate receptor delta-2 subunit; Short=GluR delta-2 subunit;                                      |     |
| 2073.02 | G.YDERQQSSSAVETKGFKL.R | not specific | gi 215273864 sp Q08174.2 PCDH1_HUMAN<br>RecName: Full=Protocadherin-1; AltName: Full=Cadherin-like protein 1; AltName: Full=Protocadherin-42; Short=PC42; |     |
| 1232.64 | C.ASQAGMTAIGAVR.H      | not specific | gi 6225157 sp Q15417.1 CNN3_HUMAN<br>RecName: Full=Calponin-3; AltName: Full=Calponin, acidic isoform                                                     |     |
| 1284.58 | N.QQ-17PVHMGMPYN.N     | not specific | CHECK<br>gi 55584092 sp Q08473.3 SQD_DROME<br>RecName: Full=RNA-binding protein squid; AltName: Full=Heterogeneous nuclear ribonucleoprotein 40;          |     |
| 1168.53 | S.VTSSSSASIGEGS.R      |              | gi 205371790 sp Q9P2Q2.3 FRM4A_HUMAN<br>RecName: Full=FERM domain-containing protein 4A                                                                   | N/A |
| 1082.66 | Q.LLGLGINIGVN.I        |              | gi 134921426 sp Q96790.2 DPGN_DIPMA<br>RecName: Full=Serine protease inhibitor dipetalogastin; (E = 5.7e-04)                                              | N/A |
| 824.32  | D.DGPFCAIN.G           |              | gi 1346041 sp P47931.1 FST_MOUSE<br>RecName: Full=Follistatin; Short=FS; AltName: Full=Activin-binding protein;                                           | N/A |
